# Supplementary material for: Floating nurseries? Scyphozoan jellyfish, their food and their rich symbiotic fauna in a tropical estuary
Source: PeerJ. 2018 Jun 19;6:e5057. doi: 10.7717/peerj.5057 (PMC6014317; doi:10.7717/peerj.5057)
Supplement: Data S1 [file peerj-06-5057-s001.xlsx]

## Sheet: Abundance
	Stomolophus meleagris
		Abundance (ind h-1)	Bell diameter (mm)	SD
Year 1	N	0	0	0	0
	D	2.8	18.1	0.565685	17.7	18.5
	J 2016	4.6	76.85	45.7498	44.5	109.2
	F	15.2	52.3846	24.4789	60.1	66.9	44.2	29.8	75	53.3	63.4	109.2	21.1	26.4	23.7	53.8	54.1
	M	18.5	50.2322	17.5642	36.315	40.5	75.3	48.9	59.9	75.5	31.2	23.6	78.5	57.2	62.8	25.3	38.4	45.2	45.4	59.7
	A	25.2	55.9174	10.7012	50.3	77.4	53.8	58.5	57	50	55.5	64.4	36.4	53.8	65.7	48.9	48.7	69.5	69.1	60.4	62.2	53	49.3	56.1	50.7	66.3	29.1
	M	14.2	33.9933	8.47757	28.4	32.4	34.5	30.5	25.8	37.5	27.7	34.2	37.5	46.8	41.2	38.3	40.5	42.5	12.1
Year 2	N		0	0	0
	D	0	0	0	0
	J 2017	6.3	57	12.8055	45.4	69.9	46.6	66.1
	F	15.2	60.1625	18.9837	66	65.1	41.1	41.3	34.4	25.5	42.8	64.3	61.8	73.3	69.8	64.8	65.5	101.2	80.6	65.1
	M	18.2	37.6714	11.3547	38.9	36.1	40.3	33.3	34.6	31.8	32.4	33.8	35.6	30.1	52.3	30.5	37.2	41.1	30.5	17.4	28.3	30.5	52.8	53.8	69.8
	A	7.5	48.3111	15.8273	29.8	29.1	28.2	45.5	57.1	64.2	57.1	54.7	69.1
	M	0	0	0	0	0
	Stomolophus meleagris
ANO 1		Abundancia (ind h-1)	Tamaño	Desvest
	Nov	0
	Dic	0
	Ene	0
	Feb	0
	Mar	0
	Abr	1	65.1	0	65.1
	May	0
		Abundancia (ind h-1)	Tamaño	Desvest
ANO 2	Nov	0
	Dic	0
	Ene	0
	Feb	3.1	51.375	3.41211	46.4	51.9	53.6	53.6
	Mar	0.33	47.3	0	47.3
	Abr	0.33	30.5	0	30.5
	May	0

## Sheet: Gut contents
	Year	2015	2015	2016	2016	2016	2016	2016	2016	2016	2016	2016	2016	2016	2016	2016	2016	2016	2016	2016	2016	2016	2016	2016	2016	2016	2016	2016	2016	2016	2016	2016	2016	2016	2016	2016	2016	2016	2016	2016	2016	2016	2016	2016	2016	2016	2016	2016	2016
	Month	DIC	DIC	ENE	ENE	FEB	FEB	FEB	FEB	FEB	FEB	FEB	FEB	FEB	FEB	FEB	FEB	FEB	MAR	MAR	MAR	MAR	MAR	MAR	MAR	MAR	MAR	MAR	MAR	MAR	MAR	MAR	MAR	MAR	APR	APR	APR	APR	APR	APR	APR	APR	ABR	ABR	ABR	ABR	ABR	ABR	ABR
	Day	15	15			29		29	29					21.1			29		15	15	26	26	14		14	14	7		7	7	18	10	10	16	23	1	23	1	7	4	2	4	29	29	29	29	29	23	23
	Code	121	122	88	99	93	95	119	120	96	97	100	103	106	107	108	116	117	1	2	4	77	92	98	101	102	104	109	123	124	125	126	127	128	3	5	7	8	9	10	12	13	76	78	79	81	83	84	90
	Bell diameter (mm)	17.7	18.5	44.5	109.2	60.1	66.9	44.2	29.8	75	53.3	63.4	109.2	21.1	26.4	23.7	53.8	54.1	36.315	40.5	75.3	48.9	59.9	75.5	31.2	23.6	78.5	57.2	62.8	25.3	38.4	45.2	45.4	59.7	50.3	77.4	53.8	58.5	57	50	55.5	64.4	36.4	53.8	65.7	48.9	48.7	69.5	69.1
Phylum	DATE CODE (M-YY)	D-15	D-15	J-16	J-16	F-16	F-16	F-16	F-16	F-16	F-16	F-16	F-16	F-16	F-16	F-16	F-16	F-16	M-16	M-16	M-16	M-16	M-16	M-16	M-16	M-16	M-16	M-16	M-16	M-16	M-16	M-16	M-16	M-16	A-16	A-16	A-16	A-16	A-16	A-16	A-16	A-16	A-16	A-16	A-16	A-16	A-16	A-16	A-16
Bacillariophyta	Coscinodiscophyceae	0	0	0	3	0	8	0	0	15	29	20	3	0	3	2	0	0	115	1	47	17	0	0	9	2	0	1	0	1	0	0	0	0	19	19	37	9	33	7	23	41	0	2	2	2	0	0	0
Arthropoda	Copepods	48	27	0	8	0	1	0	6	10	10	14	8	1	11	7	3	1	8	0	7	0	2	7	5	2	4	8	5	2	0	0	1	0	8	1	61	6	1	0	0	9	1	0	2	0	0	3	1
Bacillariophyta	Bacillariophyceae	1	0	20	9	1	17	2	0	0	4	57	8	1	1	1	0	10	2	0	0	1	0	21	3	0	0	0	0	0	0	0	0	0	3	0	3	0	0	0	0	0	0	19	5	5	0	0	0
Chordata	Fish eggs and larvae	1	1	7	5	2	7	0	0	1	13	5	5	0	2	4	0	1	10	12	3	1	0	10	2	4	0	8	1	0	4	0	2	0	0	6	29	7	5	0	3	5	0	1	0	3	9	0	0
Arthropoda	Crustaceans (unidentified)	0	0	0	0	0	0	0	0	12	0	0	0	0	0	0	0	0	2	0	0	9	0	0	0	0	0	0	0	0	0	0	0	0	0	1	4	0	1	17	5	3	0	3	2	3	0	3	4
Mollusca	Bivalve larvae	0	0	0	4	0	5	3	0	5	2	9	4	0	0	0	1	0	9	1	8	0	0	5	1	3	3	18	0	0	0	0	9	2	12	0	17	1	1	0	0	0	0	0	0	3	7	0	1
Mollusca	Gastropod larvae	0	0	0	13	0	5	0	1	4	2	13	13	0	0	1	0	5	7	0	1	0	2	3	2	0	1	14	0	0	0	0	0	0	1	2	6	8	0	0	0	2	2	0	0	0	0	0	6
Arthropoda	Cirriped larvae	1	1	0	0	2	0	3	0	3	0	0	0	0	0	0	3	0	3	0	3	0	0	0	0	0	0	0	0	0	0	0	2	0	6	0	8	4	0	2	0	1	3	0	0	0	0	0	2
Chaetognatha	Sagittoidea	0	2	0	0	0	0	0	0	0	0	0	0	0	0	0	3	0	1	0	0	0	5	0	0	0	1	0	2	0	0	1	0	1	5	0	8	4	0	0	2	2	0	0	0	1	2	0	0
Ciliophora	Ciliophora	0	0	0	0	0	0	0	0	0	0	0	0	0	0	0	0	0	0	0	0	0	0	0	0	0	0	0	0	0	0	0	0	0	4	0	1	0	6	0	0	3	0	0	0	0	0	0	0
Annelida	Polychaete larvae or juvenile	0	0	0	0	1	0	0	0	0	0	0	0	0	0	0	0	0	0	0	0	4	0	0	0	0	0	0	0	0	0	0	1	0	0	0	0	0	0	0	0	0	0	0	0	0	1	0	0
Arthropoda	Brachiuran larvae	0	0	0	2	0	0	0	0	1	0	0	1	1	0	0	3	0	0	0	1	0	0	0	0	0	0	0	0	1	0	0	0	0	1	0	0	3	0	0	0	0	0	0	0	0	1	0	0
Nematoda	Mematoda	0	0	0	0	0	0	0	0	0	0	0	0	0	0	0	0	0	0	0	0	0	0	0	0	0	0	0	0	0	0	2	0	0	0	0	0	0	0	0	0	0	0	0	0	0	0	0	0
Arthropoda	Amphipods	2	0	0	0	0	0	0	0	0	0	0	0	0	0	0	0	0	0	0	0	0	0	0	0	0	0	0	0	0	0	0	0	0	0	0	0	1	0	0	0	0	0	0	0	0	0	0	0
Arthropoda	Decapoda: Emerita sp.	0	0	0	0	0	0	0	0	0	0	0	0	0	0	0	0	0	0	0	0	0	0	0	0	0	0	0	0	0	0	0	0	0	0	1	0	0	0	0	2	1	0	0	0	0	0	0	0
Other		7	4	16	7	6	15	8	5	0	0	0	7	0	4	0	9	4	0	0	0	1	9	13	0	3	5	0	5	9	7	6	5	6	0	0	0	0	2	4	1	1	8	1	0	0	11	0	0
[truncated: 73 more columns]
